# Supplementary material for: CTRP1 Aggravates Cardiac Fibrosis by Regulating The NOX2/P38 Pathway in Macrophages
Source: PubMed Central journal article supplement — Cell J. 2022 Dec 12;24(12):732–40. doi: 10.22074/CELLJ.2022.557327.1043 (PMC9790075; doi:10.22074/cellj.2022.557327.1043), 2022-12-12
Supplement: Cell-J-24-732-s01.pdf [file Cell-J-24-732-s01.pdf]

## Supplementary Information for

## CTRP1 Aggravates Cardiac Fibrosis by Regulating The NOX2/P38 Pathway in Macrophages

Chenyu Li, M.D.<sup>1</sup>, Shaozhen Ying, Ph.D.<sup>2</sup>, Xiaolin Wu, M.D.<sup>1</sup>, Tongjian Zhu, M.D.<sup>1</sup>, Qing Zhou, M.D.<sup>1</sup>, Yue Zhang, M.D.<sup>1</sup>, Yongsheng Liu, M.D.<sup>1</sup>, Rui Zhu, M.D.<sup>1</sup>, He Hu, Ph.D.<sup>1\*</sup>

1. Department of Cardiology, Xiangyang Central Hospital, Affiliated Hospital of Hubei University of Arts and Science, Xiangyang, Hubei, P.R. China

2. Department of Cardiology, Jiangxi provincial People's Hospital, Affiliated to Nanchang University, Nanchang, Jiangxi, China

\*Corresponding Address: Department of Cardiology, Xiangyang Central Hospital, Affiliated Hospital of Hubei University of Arts and Science, Xiangyang, Hubei, P.R. China  
Email: 2012103020029@whu.edu.cn

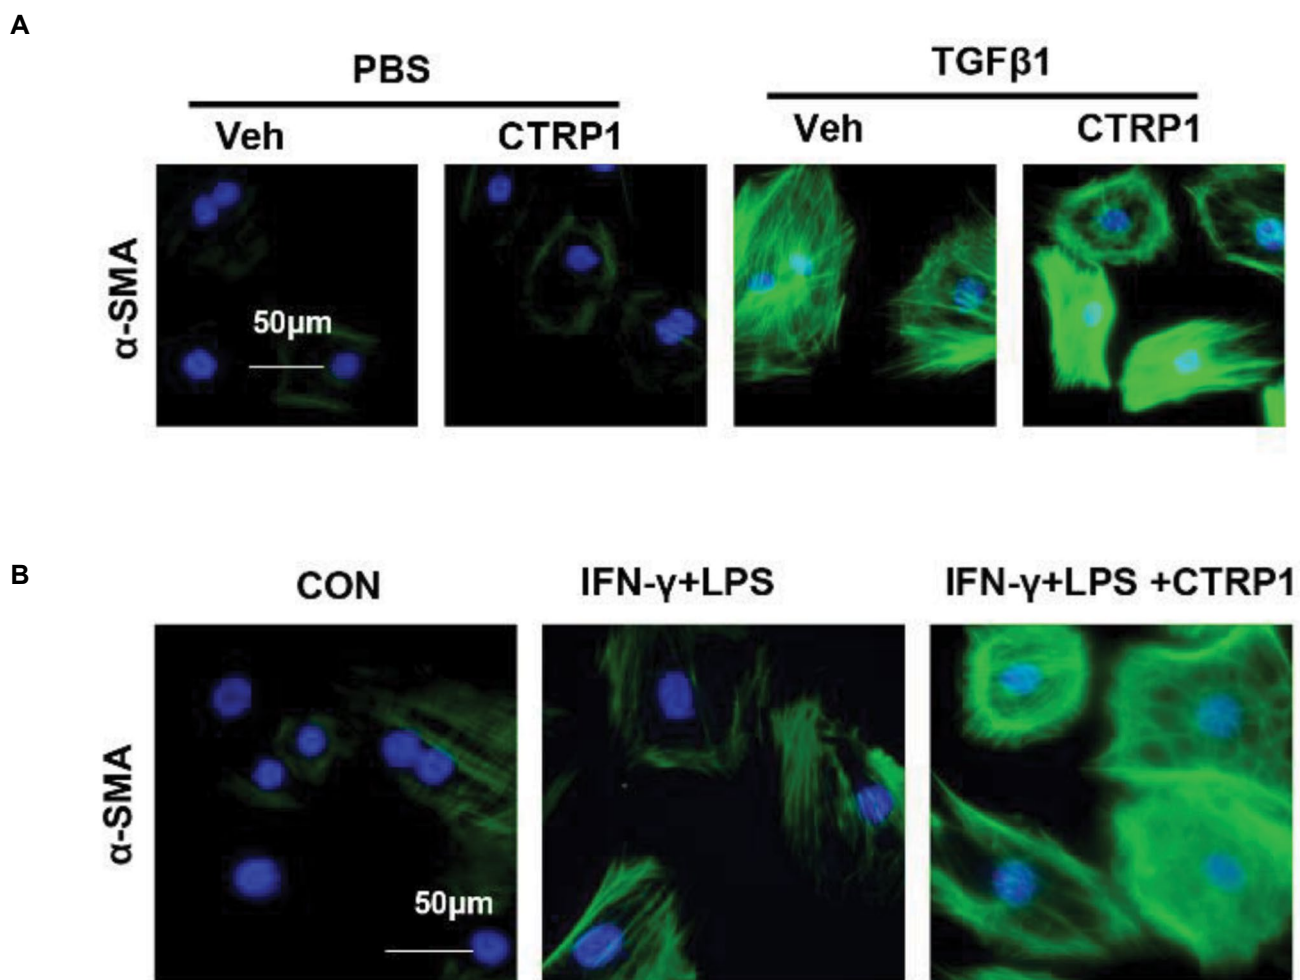

**Fig.S1:** The effect of CTRP1 on fibroblasts activation. **A.** α-SMA staining in fibroblasts treated with recombinant CTRP1 (8 µg/mL) and TGFβ1. **B.** α-SMA staining in fibroblasts co-cultured with activated or CTRP1-treated macrophages (n=6). Veh; Vehicle, PBS; Phosphate balanced normal saline, CON; Control, IFN-γ; Interferony, and LPS; Lipopolysaccharide.
